# Supplementary material
Source: PubMed Central journal article supplement (PMC5823761)
Supplement: NIHMS932570-supplement-Graphic_Abstract.pdf [file NIHMS932570-supplement-Graphic_Abstract.pdf]

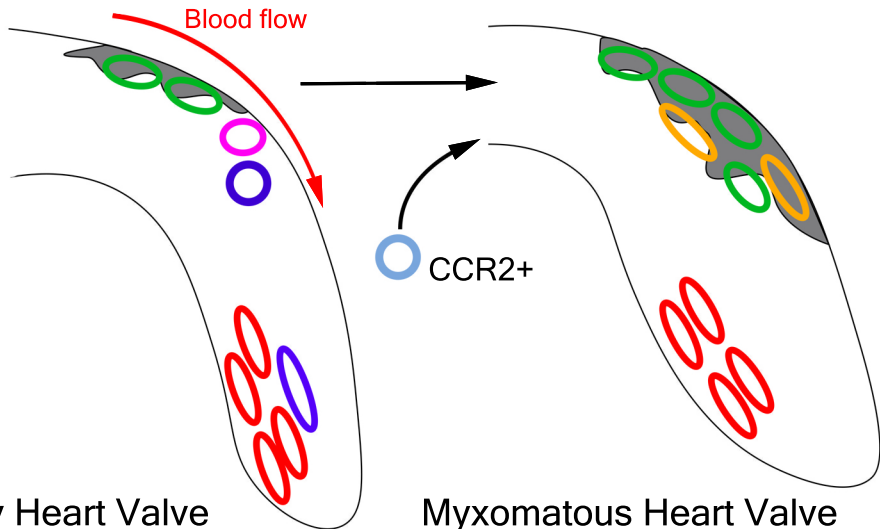

### Healthy Heart Valve

### Myxomatous Heart Valve

Myeloid cells (CD11b+)

-  CD206+
-  MHCII+
-  Dendritic cells

 Expansion of hyaluronan modified with Inter-a-Trypsin Inhibitor

Increased of  Infiltrated monocytes

Non-Myeloid cells (CD11b-)

-  Dendritic cells
-  Other (lymphocytes?)

-  CD206+ MHCII-
-  CD206+ MHCII+
